# Supplementary material for: Label-free intratissue activity imaging of alveolar organoids with dynamic optical coherence tomography
Source: PubMed Central journal article supplement (PMC10191660; doi:10.1364/boe.488097), 2023-04-27
Supplement: boe-14-5-2333-s001.pdf [file boe-14-5-2333-s001.pdf]

## Label-free intratissue activity imaging of alveolar organoids with dynamic optical coherence tomography: supplement

RION MORISHITA,<sup>1</sup>  TOSHIO SUZUKI,<sup>2,3</sup> PRADIPTA MUKHERJEE,<sup>1</sup>   
IBRAHIM ABD EL-SADEK,<sup>1,4</sup>  YIHENG LIM,<sup>1</sup>  ANTONIA  
LICHTENEGGER,<sup>1,5</sup>  SHUICHI MAKITA,<sup>1</sup>  KIRIKO TOMITA,<sup>1</sup> YUKI  
YAMAMOTO,<sup>3</sup> TETSU HARU NAGAMOTO,<sup>3</sup> AND YOSHI AKI YASUNO<sup>1,\*</sup> 

<sup>1</sup>Computational Optics Group, University of Tsukuba, Tsukuba, Ibaraki 305-8573, Japan

<sup>2</sup>Department of Medical Oncology, Faculty of Medicine, University of Tsukuba, Ibaraki 305-8575, Japan

<sup>3</sup>HiLung Inc., Kyoto, Japan

<sup>4</sup>Department of Physics, Faculty of Science, Damietta University, New Damietta City 34517, Damietta, Egypt

<sup>5</sup>Center for Medical Physics and Biomedical Engineering, Medical University of Vienna, Währinger Gürtel 18-20, 4L, 1090, Vienna, Austria

<https://optics.bk.tsukuba.ac.jp/COG/>

\*[yoshiaki.yasuno@cog-labs.org](mailto:yoshiaki.yasuno@cog-labs.org)

---

This supplement published with Optica Publishing Group on 27 April 2023 by The Authors under the terms of the [Creative Commons Attribution 4.0 License](https://creativecommons.org/licenses/by/4.0/) in the format provided by the authors and unedited. Further distribution of this work must maintain attribution to the author(s) and the published article's title, journal citation, and DOI.

Supplement DOI: <https://doi.org/10.6084/m9.figshare.22664452>

Parent Article DOI: <https://doi.org/10.1364/BOE.488097>

# Label-free intratissue activity imaging of alveolar organoids with dynamic optical coherence tomography: supplemental document

In this supplementary material, we provide eleven figures, Figs. [S1–S11](#). These figures show the LIV images of the alveolar organoids at several depth, and supplement Fig. 3 of the full-length manuscript. These samples are normal and bleomycin-model alveolar organoids at Days +3, +7, +10, +16, +17, and +18, while Fig. 3 of the full-length manuscript presents the normal organoid at Day +3. The field of view of the *en face* images (square panes) is 3 mm × 3 mm. The depth-independent distribution of the alveoli and fibroblasts were found in all samples.

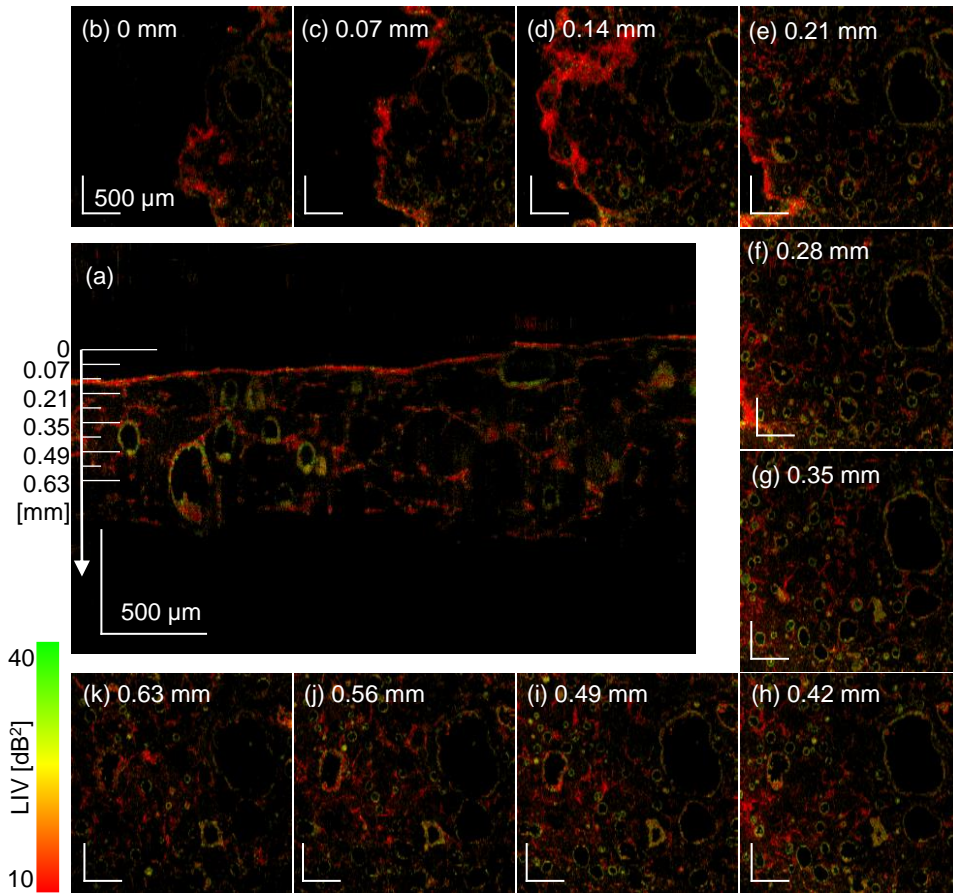

**Fig. S1.** The LIV *en face* images of Day +3 bleomycin-model organoid at several depths (square panes, FOV is 3 mm × 3 mm). The images were extracted at the depth of every 0.07 mm, and the depth positions are indicated in the cross-sectional LIV image at the center. The alveoli with high-LIV (green or green-red mixture) borders, which are possibly alveolar epithelium, and the fibroblasts are uniformly distributed in 3D.

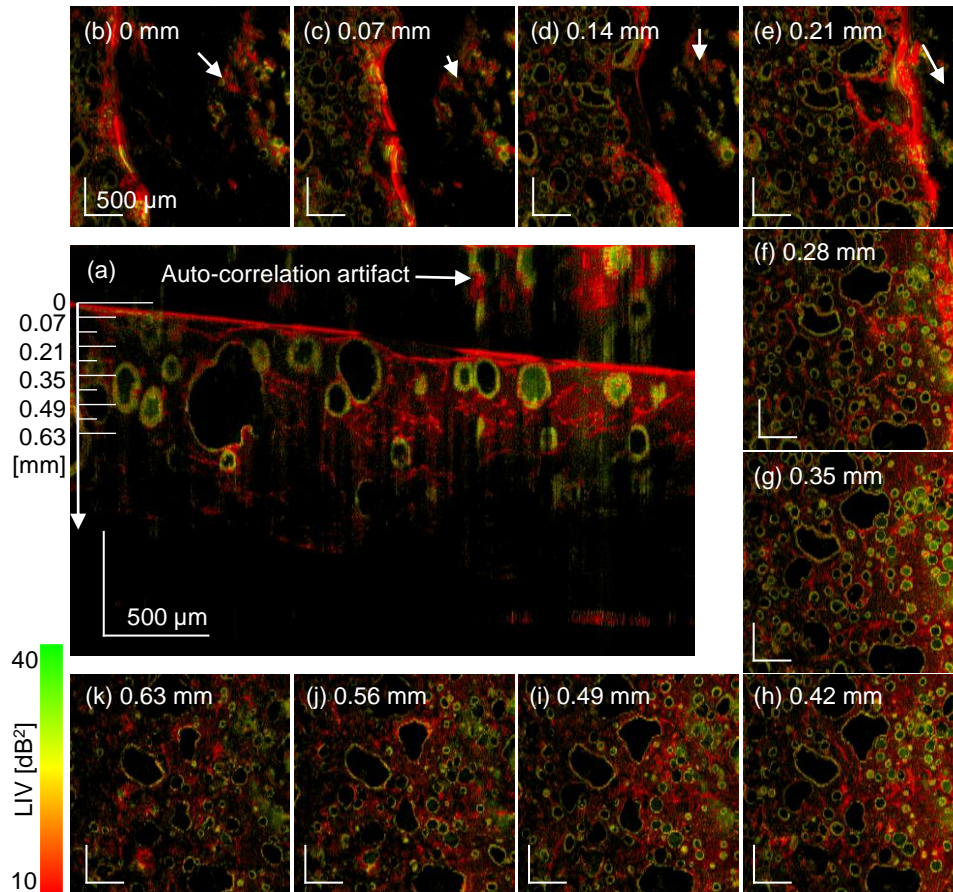

**Fig. S2.** The case of Day +7 normal organoid. The appearances indicated by white arrows are auto-correlation artifacts. Here after, all figures are presented in the same manner with Fig. S1.

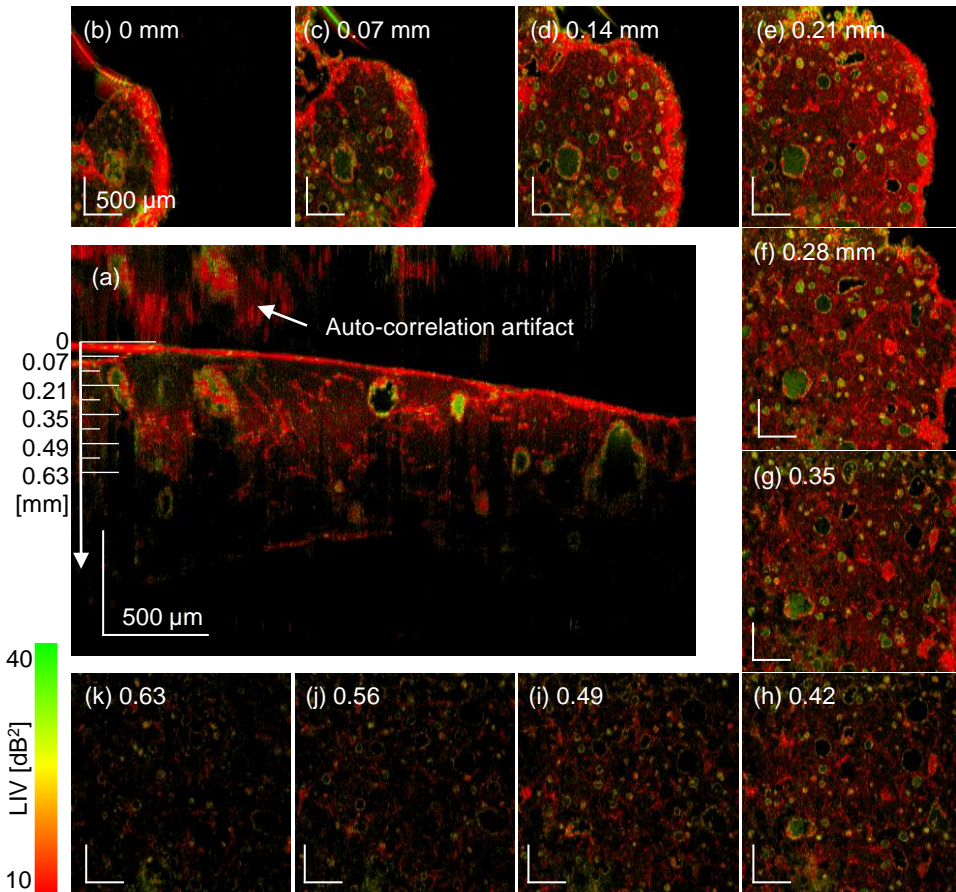

**Fig. S3.** The case of Day +7 bleomycin-model organoid.



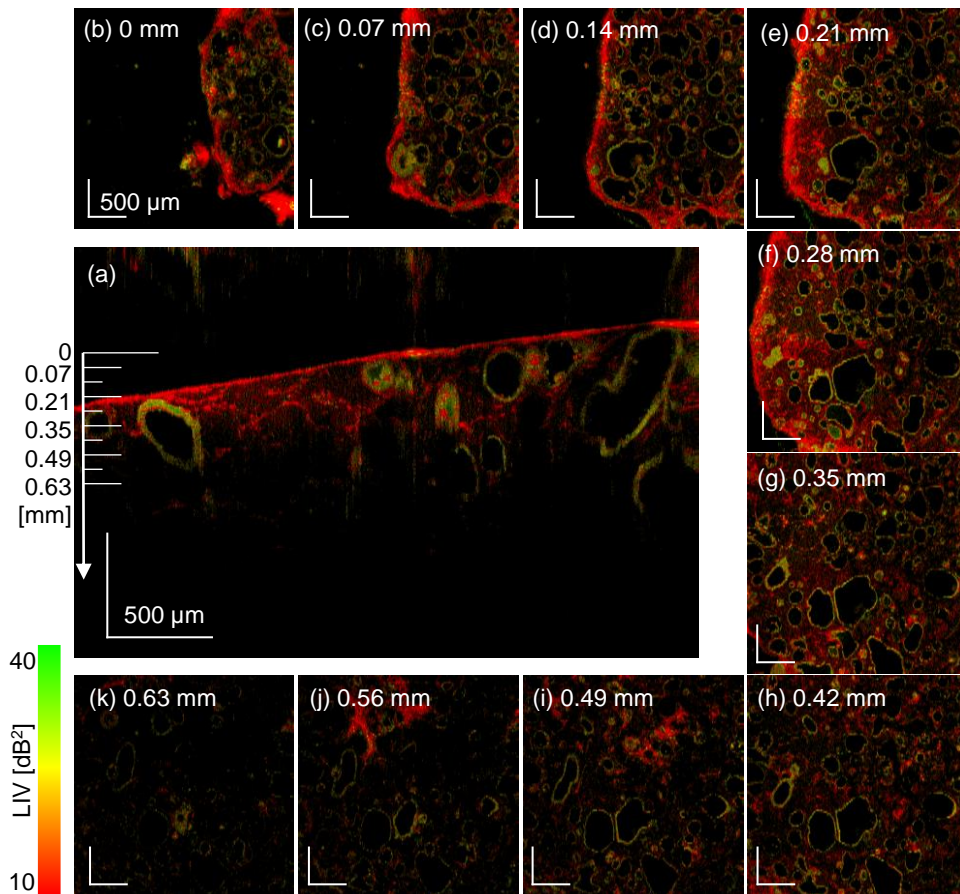

**Fig. S4.** The case of Day +10 normal organoid.

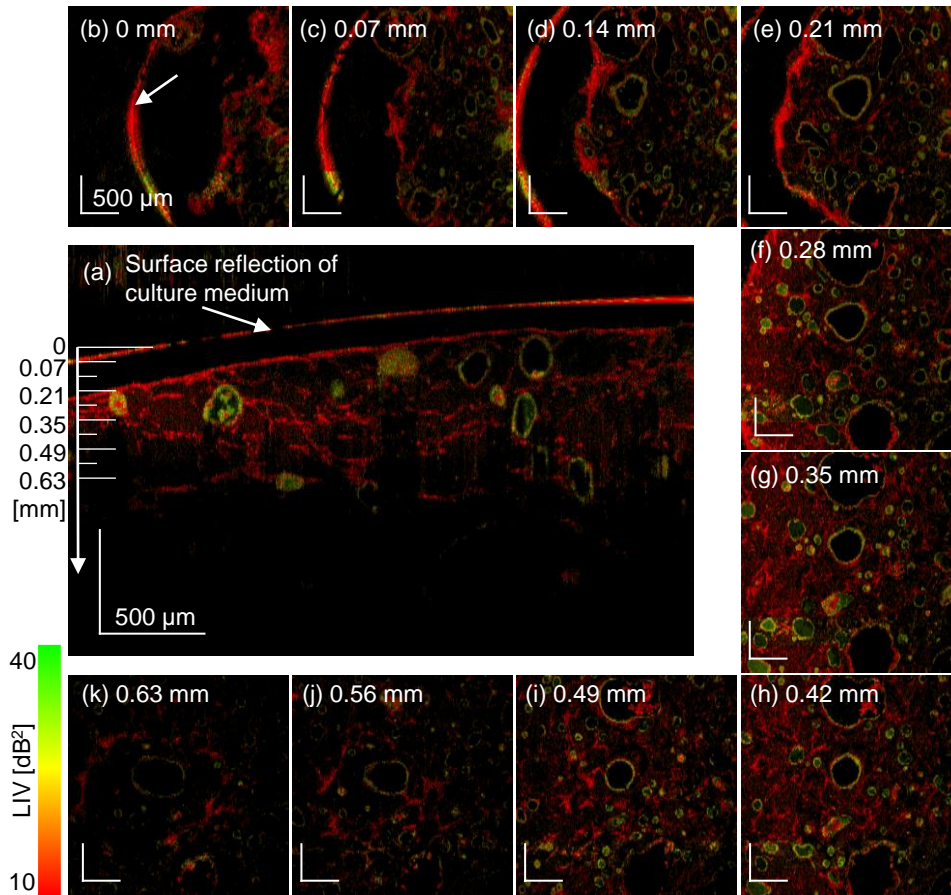

**Fig. S5.** The case of Day +10 bleomycin-model organoid. The appearances indicated by white arrows are surface reflection of culture medium.

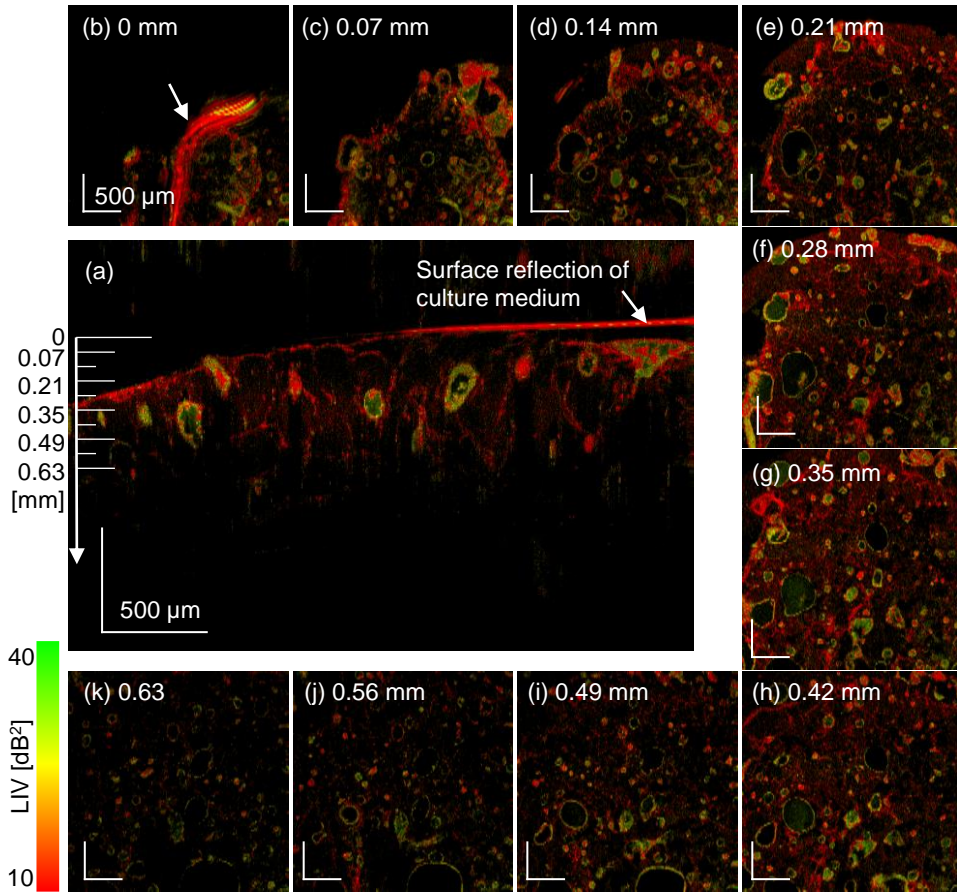

**Fig. S6.** The case of Day +16 normal organoid. The appearances indicated by white arrows are surface reflection of culture medium.



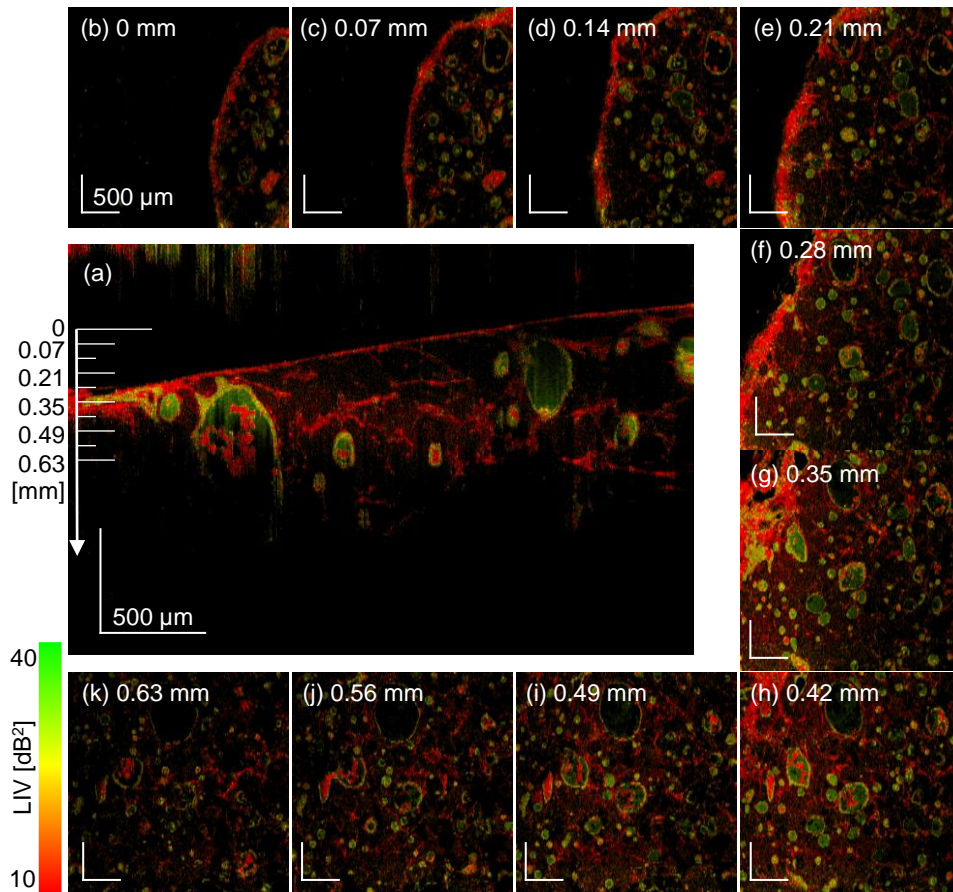

**Fig. S7.** The case of Day +16 bleomycin-model organoid.

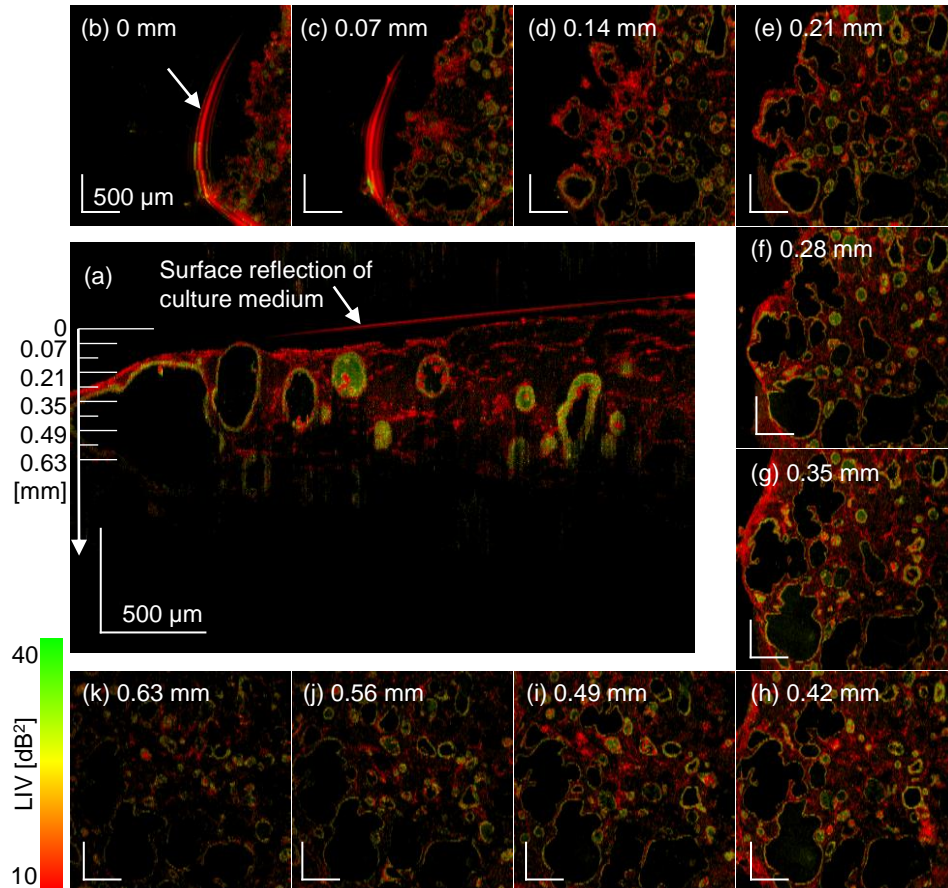

**Fig. S8.** The case of Day +17 normal organoid. The appearances indicated by white arrows are surface reflection of culture medium.

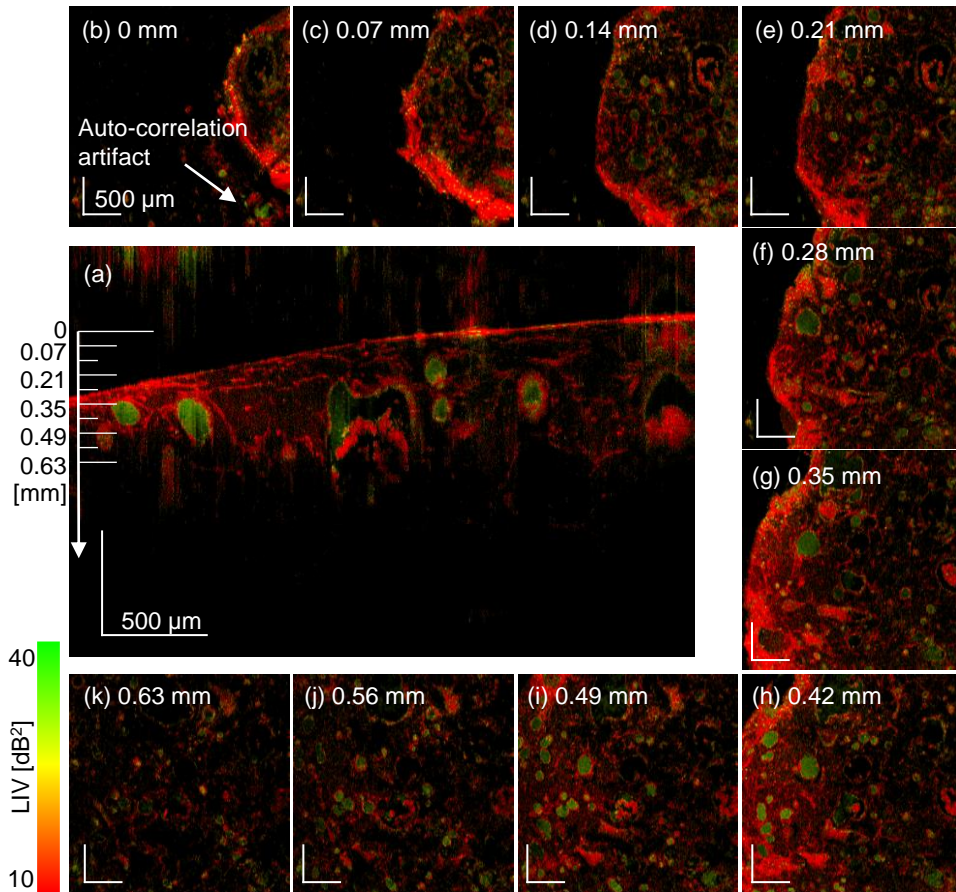

**Fig. S9.** The case of Day +17 bleomycin-model organoid. The appearance indicated by a white arrow is an auto-correlation artifact.

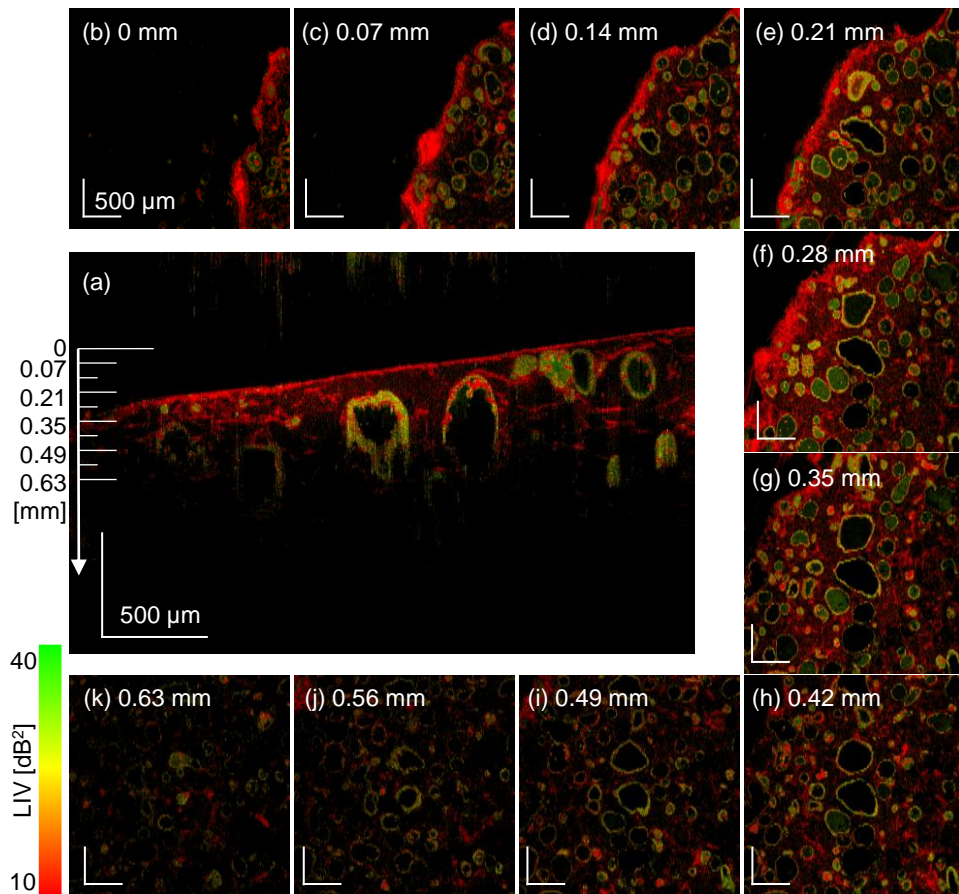

**Fig. S10.** The case of Day +18 normal organoid.



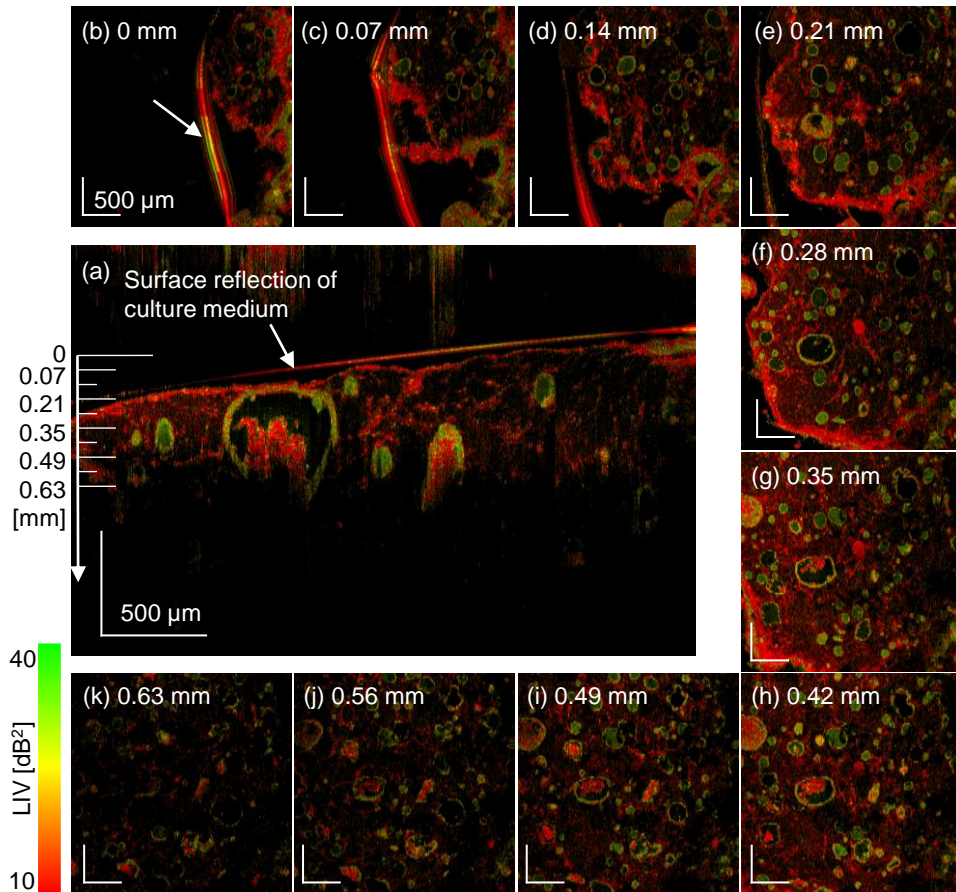

**Fig. S11.** The case of Day +18 bleomycin-model organoid. The appearances indicated by white arrows are surface reflection of culture medium.
